# Supplementary material
Source: MDPI journal article supplement (https://www.mdpi.com/2073-4344/13/2/287)
Supplement: s1 [file s1]

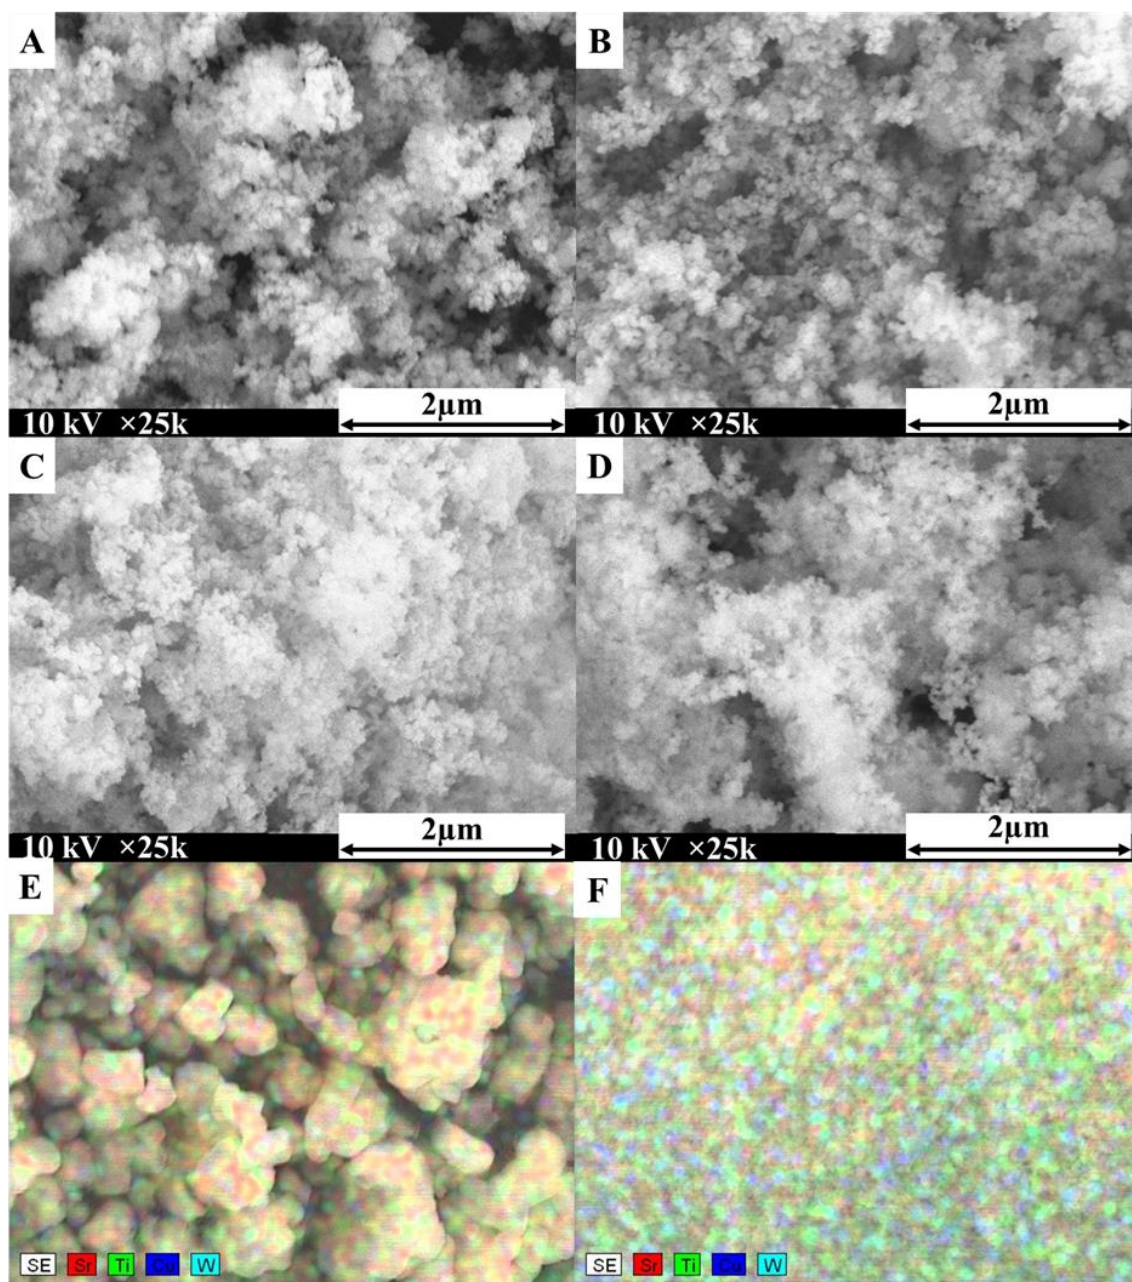

**Figure S1.** SEM images of the selected samples. A: CWS0, B: CWS1, C: CWS2.5, D: CWS3, EDX-mapping: E: CWS1, F: CWS2.5.

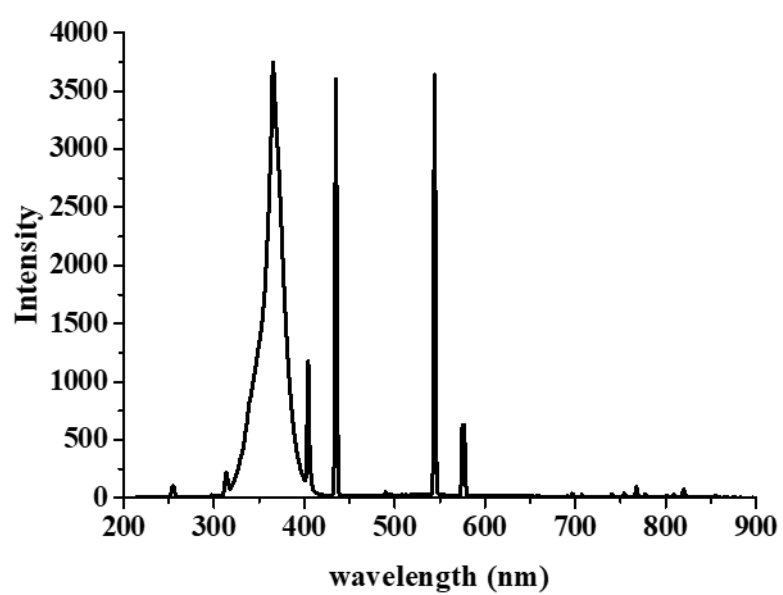

**Figure S2.** Emission spectrum of the light source used during the photocatalytic experiments.
